# Supplementary material for: Generation of a cancer testis antigen mCherry reporter HCT116 colorectal carcinoma cell line
Source: PubMed Central journal article supplement (PMC6197641; doi:10.1016/j.heliyon.2018.e00858), 2018-10-13

# Supplemental Figure S1

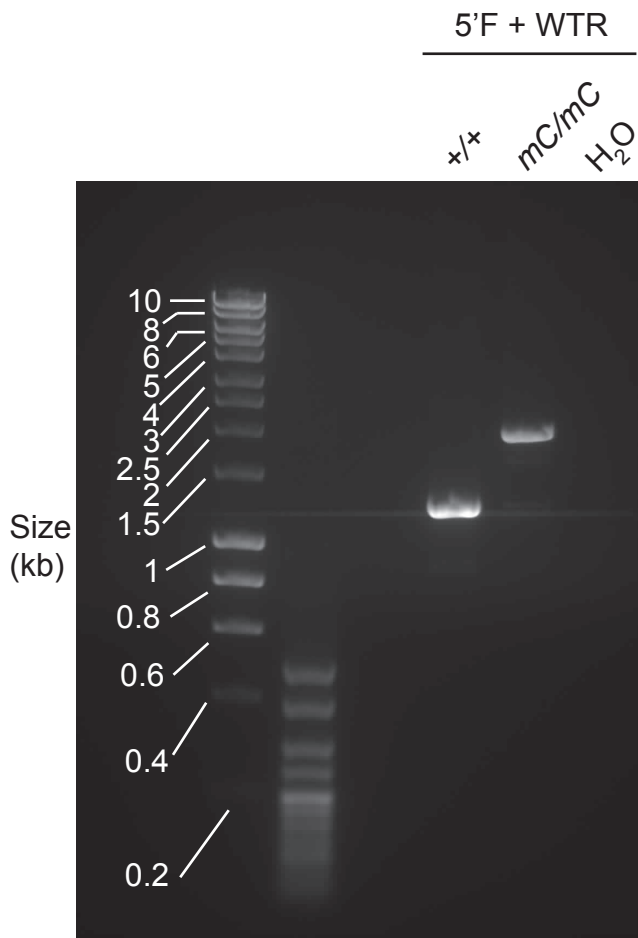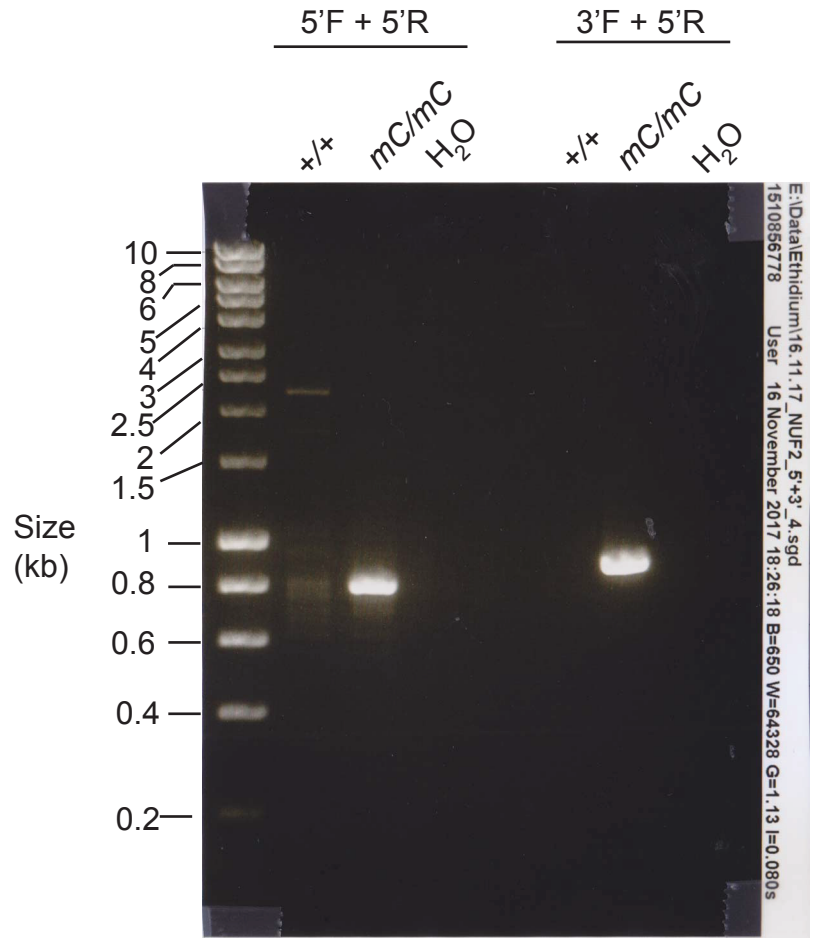

Supplement: mmc1.pdf [file mmc1.pdf]
